# Supplementary material for: Intraductal Carcinoma of the Prostate as a Cause of Prostate Cancer Metastasis: A Molecular Portrait
Source: MDPI journal article supplement (doi:10.3390/cancers14030820), 2022-02-06
Supplement: s1 [file s1]

# Intraductal Carcinoma of the Prostate as a Cause of Prostate Cancer Metastasis: A Molecular Portrait

Helen Pantazopoulos, Mame-Kany Diop, Andrée-Anne Grosset, Frédérique Rouleau-Gagné, Afnan Al-Saleh, Teodora Boblea and Dominique Trudel

**Table S1.** (A). IDC-P predicts the presence of lymph node metastasis at diagnosis. (B). IDC-P predicts the occurrence of distant metastasis. Italicized lines for studies including the same men, or subgroup of the main cohort. (C). IDC-P predicts poor prognosis in men with metastatic PCa. (D). IDC-P predicts death from prostate cancer.

| (A)                     |      |                |                |                               |                                              |                                    |                                                          |
|-------------------------|------|----------------|----------------|-------------------------------|----------------------------------------------|------------------------------------|----------------------------------------------------------|
| First author, reference | Year | N              | Specimen type  | IDC-P alone or in combination | % of IDC-P in the cohort                     | Univariate vs multivariate testing | Risk of lymph node metastasis                            |
| O'Brien C. [19]         | 2010 | 50             | 50 RP<br>22 Bx | IDC-P                         | 20% (10/50) RP<br>0% (0/22) Bx               | Multivariate                       | OR 4.6, 95% CI: 1.5-14.2, p=0.007                        |
| Xu N. [20]              | 2020 | 316            | RP             | IDC-P                         |                                              | Univariate                         | 22.89% ( $\pm 6.76$ ) vs. 20.73% ( $\pm 6.56$ ), p=0.043 |
| Kryvenko O.N. [21]      | 2013 | 368            | RP             | IDC-P                         | 32% (116/368)                                | Univariate                         | 42% (78/184) vs. 21% (38/184), p<0.001                   |
| Downes M.R. [22]        | 2019 | 110            | 104 RP<br>6 CP | IDC-P/CC                      | IDC-P: 65% (71/110)<br>CC: 75% (83/110)      | NA                                 | 94% (103/110)                                            |
| Downes M.R. [23]        | 2021 | 543            | RP             | IDC-P/CC                      | 60% (203/340) RP                             | Univariate                         | OR: 14.06, 95% CI: 3.32-59.5, p=0.003                    |
| Downes M.R. [23]        | 2021 | 543            | RP             | IDC-P/CC                      | 60% (203/340) RP                             | Multivariate                       | OR: 5.12, 95% CI: 1.37-19.2, p=0.015                     |
| Downes M.R. [23]        | 2021 | 275            | Bx             | IDC-P/CC                      | 10% (20/197) Bx                              | Univariate                         | OR: 3.29, 95% CI: 1.28-8.42, p=0.013                     |
| Downes M.R. [23]        | 2021 | 275            | Bx             | IDC-P/CC                      | 10% (20/197) Bx                              | Multivariate                       | OR: 4.42, 95% CI: 1.29-15.14, p=0.018                    |
| Lindberg J. [24]        | 2015 | 1              | RP             | IDC-P                         | 100% (1/1)                                   | NA                                 | IDC-P/metastasis share 83% break-point regions           |
| Dinerman B.F. [25]      | 2017 | 159,777 (SEER) | RP             | IDC-P                         | 0.002% (242/159,777)                         | Univariate                         | 5.8% (14/242) vs. 2.4% (3,779/159,535), p<0.001          |
| Hollemans E. [53]       | 2019 | 420            | RP             | IDC-P/CC vs. CC               | IDC-P/CC: n=79<br>CC : n=125<br>IDC-P : n=24 | Univariate                         | 11.4% vs. 1.6%, p=0.003                                  |

|                      |      |     |    |                       |                                              |            |                                          |
|----------------------|------|-----|----|-----------------------|----------------------------------------------|------------|------------------------------------------|
| Hollemans E.<br>[53] | 2019 | 420 | RP | IDC-P/CC vs.<br>IDC-P | IDC-P/CC: n=79<br>CC : n=125<br>IDC-P : n=24 | Univariate | p=0.32                                   |
| Kimura K. [31]       | 2014 | 206 | RP | IDC-P                 | 50.5% (104/206)                              | Univariate | 24% (25/104) vs. 5% (5/102),<br>p<0.0001 |

Abbreviations: Bx: biopsy; CI: confidence interval; CC: cribriform carcinoma; CP: cystoprostatectomy; IDC-P: intraductal carcinoma of the prostate; OR: odds ratio; RP: radical prostatectomy; SEER: Surveillance, Epidemiology and End Results Program.

(B)

| First author, reference | Year | N                              | Specimen type              | IDC-P alone or in combination | % of IDC-P in the cohort           | Endpoint                                          | Univariate vs multivariate testing | Other factors                                                                                                                                    | Result                                                   |
|-------------------------|------|--------------------------------|----------------------------|-------------------------------|------------------------------------|---------------------------------------------------|------------------------------------|--------------------------------------------------------------------------------------------------------------------------------------------------|----------------------------------------------------------|
| Trinh V.Q. [26]         | 2018 | 85                             | RP                         | IDC-P                         | 76.5% (65/85)                      | Distant metastasis at initial recurrence          | Multivariate                       | Age, PSA, % of prostate involved, GG, LVI, positive margins, extraprostatic extension, SVI, and nodal metastasis                                 | OR: 6.27, 95% CI: 1.43–27.6, p=0.015                     |
| Kimura K. [31]          | 2014 | 206                            | RP                         | IDC-P                         | 50.5% (104/206)                    | PFS (time from RP to local or distant metastases) | Multivariate                       | Age, clinical T stage, PSA, Bx GS, neoadjuvant and/or adjuvant hormone therapy                                                                   | HR: 3.07, 95% CI: 1.44–6.58, p=0.0038                    |
| Tom M.C. [27]           | 2019 | 237 GS7                        | Bx                         | IDC-P                         | 13% (30/237)                       | Distant metastasis-free survival                  | Multivariate                       | GG 3, high risk group, 50% or more positive biopsy cores, NCCN risk group, race, PSA, ADT                                                        | HR: 4.18, 95% CI 1.43–12.28, p=0.01                      |
| Van der Kwast T. [28]   | 2012 | Cohort 1: 118<br>Cohort 2: 135 | 1: Bx<br>2: 95 Bx, 45 TURP | IDC-P                         | 1: 19% (23/118)<br>2: 22% (30/135) | Clinical PFS                                      | Univariate                         | –                                                                                                                                                | 2: RT + LTAD arm<br>HR: 2.83, 95% CI: 1.16–6.92, p=0.018 |
| Van der Kwast T. [28]   | 2012 | Cohort 1: 118<br>Cohort 2: 135 | 1: Bx<br>2: 95 Bx, 45 TURP | IDC-P                         | 1: 19% (23/118)<br>2: 22% (30/135) | Clinical PFS                                      | Multivariate                       | GS                                                                                                                                               | 2: RT arm<br>HR: 2.33, 95% CI: 1.14–4.76, p=0.02         |
| Kweldam C.F. [29]       | 2015 | 161 GS7                        | RP                         | IDC-P                         | 41% (66/161)                       | Distant metastasis                                | Univariate                         | –                                                                                                                                                | HR:2.5, 95% CI: 1.2–4.7, p=0.007                         |
| Chua M.L.K. [30]        | 2017 | 805                            | RP                         | IDC-P/CC                      | 20% (165/805)                      | Distant metastasis                                | Univariate                         | –                                                                                                                                                | p<0.0001                                                 |
| Chua M.L.K. [30]        | 2017 | 805                            | RP                         | IDC-P/CC                      | 20% (165/805)                      | Distant metastasis                                | Multivariate                       | Clinical T stage, ISUP grade, PSA                                                                                                                | HR: 3.31, 95% CI: 1.76–6.21, p<0.001                     |
| Hansum T. [32]          | 2019 | 1064                           | RP                         | IDC-P/CC                      | 53.4% (568/1064)                   | Metastasis-free survival                          | Multivariate                       | PSA, pathologic T stage, GG, margin status, pelvic LN status, single cell/cords, small solid nests, medium to large solid fields, comedonecrosis | HR: 9.9, 95% CI: 3.9–25.5, p<0.001                       |
| Hollemans E. [33]       | 2021 | 140 GS8                        | RP                         | IDC-P/CC                      | 62% (82/140)                       | Metastasis-free survival                          | Univariate                         | –                                                                                                                                                | HR: 6.7, 95% CI: 2.0-21.9), p=0.002                      |
| Hollemans E. [33]       | 2021 | 140 GS8                        | RP                         | IDC-P/CC                      | 62% (82/140)                       | Metastasis-free survival                          | Multivariate                       | Age, PSA, pathologic T stage, GG, margin status, pelvic LN status                                                                                | HR: 3.5, 95% CI: 1.0-12.3), p=0.05                       |

|                  |      |              |    |              |                  |                             |              |               |                                                                       |
|------------------|------|--------------|----|--------------|------------------|-----------------------------|--------------|---------------|-----------------------------------------------------------------------|
| Holleman E. [34] | 2020 | 835<br>GG1-2 | RP | IDC-P/CC     | 27%<br>(228/835) | Distant<br>metastasis       | NA           | –             | 6% (13/228) GG2 IDC-P/CC<br>vs 0% (0/399) GG1-2<br>without IDC-P/CC   |
| Holleman E. [34] | 2020 | 835<br>GG1-2 | RP | IDC-P/CC     | 36%<br>(228/627) | LN or distant<br>metastasis | NA           | –             | 10% (22/228) GG2 IDC-<br>P/CC vs 0% (0/399) GG1-2<br>without IDC-P/CC |
| Velho P.I. [35]  | 2019 | 60 GG5       | RP | IDC-P/ductal | 15% (9/60)       | Metastasis-free<br>survival | Univariate   | –             | HR: 3.15, 95% CI: 1.3-7.6,<br>p=0.011                                 |
| Velho P.I. [35]  | 2019 | 60 GG5       | RP | IDC-P/ductal | 15% (9/60)       | Metastasis-free<br>survival | Multivariate | Age, PSA, SVI | HR: 3.78, 95% CI: 1.51-9.45,<br>p=0.004                               |

Abbreviations: ADT: androgen deprivation therapy; Bx: biopsy; CI: confidence interval; CC: cribriform carcinoma; GG: grade group; GS: Gleason score; HR: hazard ratio; IDC-P: intraductal carcinoma of the prostate; LN: lymph node; LTAD: long-term androgen deprivation; LVI: lymphovascular invasion; OR: odds ratio; PFS: progression-free survival; NCCN: National Comprehensive Cancer Network®; PSA: prostate specific antigen; RP: radical prostatectomy; RT: radiotherapy; SVI: seminal vesicle invasion; TURP: transurethral resection of the prostate.

(C)

| First author, reference    | Year | N                     | Specimen type | IDC-P alone or in combination | % of IDC-P in the cohort | Endpoint                    | Univariate vs multivariate testing | Other factors                                                                         | Results                                                                     |
|----------------------------|------|-----------------------|---------------|-------------------------------|--------------------------|-----------------------------|------------------------------------|---------------------------------------------------------------------------------------|-----------------------------------------------------------------------------|
| Chen Z. [17]               | 2015 | 45                    | Bx            | IDC-P                         | 62.5% (28/45)            | PSA doubling time < 30 days | Univariate                         | –                                                                                     | 46.4% (13/28) vs. 5.9% (1/17), p=0.004                                      |
| Zhao T. [37]               | 2017 | 131                   | Bx            | IDC-P                         | 47.3% (62/131)           | PSA doubling time < 30 days | Univariate                         | –                                                                                     | 37.1% (23/62) vs. 18.8% (13/69), p=0.019                                    |
| Chen Z. [17]               | 2015 | 45                    | Bx            | IDC-P                         | 62.5% (28/45)            | PSA Progression             | Univariate                         | –                                                                                     | 331.4 ± 18.9 vs. 65.8 ± 7.6, p=0.009                                        |
| Zhao T. [36]               | 2015 | 278                   | Bx            | IDC-P                         | 20.5% (57/278)           | CRPC-free survival          | Univariate                         | –                                                                                     | 46.05 ± 1.39 vs. 22.98 ± 1.80 mo, p<0.001                                   |
| Zhao T. [36]               | 2015 | 278                   | Bx            | IDC-P                         | 20.5% (57/278)           | CRPC-free survival          | Multivariate                       | GS, ALP, Hg, PSA                                                                      | 46.05 ± 1.39 vs. 22.98 ± 1.80 mo, HR = 4.886, 95% CI: 1.444–16.555, p=0.011 |
| Zhao J. [38]               | 2019 | 644                   | Bx            | IDC-P                         | 28.0% (180/644)          | CRPC-free survival          | Multivariate                       | GS, ECOG score, ALP, LDH, Hg, IDC-P proportion, IDC-P pattern, IDC-P based risk group | HR: 1.63, 95% CI 1.24–2.14, p<0.001                                         |
| Zhao J. [38]               | 2019 | 644                   | Bx            | >10% IDC-P (tumour content)   | 12.6% (81/644)           | CRPC-free survival          | Multivariate                       | GS, ECOG score, ALP, LDH, Hg, IDC-P pattern, IDC-P based risk group                   | HR: 2.11, 95% CI: 1.52–2.93, p<0.001                                        |
| Zhao J. [39]               | 2018 | 314 (training cohort) | Bx            | IDC-P                         | 27.1% (85/314)           | CRPC-free survival          | Multivariate                       | Age, GS, ECOG score, PSA, Hg, ALP                                                     | HR: 1.82, 95% CI: 1.35–2.44, p<0.001                                        |
| Abascal-Junquera J.M. [18] | 2021 | 118                   | Bx            | IDC-P                         | 31.4% (37/118)           | CRPC-free survival          | Univariate                         | –                                                                                     | 24.7 mo (IQR 16.7–32.7) vs. 10.2 mo (IQR 4.2–16.2), p=0.007                 |
| Abascal-Junquera J.M. [18] | 2021 | 118                   | Bx            | IDC-P                         | 31.4% (37/118)           | Time to second-line therapy | Univariate                         | –                                                                                     | 6.2 mo (IQR 3.2–9.2) vs. 10.6 mo (IQR 5.6–15.6), p=0.05                     |

Abbreviations: ALP: alkaline phosphatase; Bx: biopsy; CFS: castrate-resistant prostate cancer-free survival; CI: confidence interval; CRPC: castrate-resistant prostate cancer; ECOG: Eastern Cooperative Oncology Group; GS: Gleason score; Hg: Hemoglobin; HR: hazard ratio; IDC-P: intraductal carcinoma of the prostate; LDH: lactate dehydrogenase; mo: months; PSA: prostate specific antigen; RP: radical prostatectomy; TURP: transurethral resection of the prostate.

| (D)                              |      |                        |               |                               |                          |                                    |                                                                                              |                                                                                             |
|----------------------------------|------|------------------------|---------------|-------------------------------|--------------------------|------------------------------------|----------------------------------------------------------------------------------------------|---------------------------------------------------------------------------------------------|
| First author, reference          | Year | N                      | Specimen type | IDC-P alone or in combination | % of IDC-P in the cohort | Univariate vs multivariate testing | Other factors                                                                                | Results                                                                                     |
| <i>Overall survival</i>          |      |                        |               |                               |                          |                                    |                                                                                              |                                                                                             |
| Kimura K. [31]                   | 2014 | 206                    | RP            | IDC-P                         | 50.5% (104/206)          | Univariate                         | –                                                                                            | p<0.0001                                                                                    |
| Zhao T. [36]                     | 2015 | 278                    | Bx            | IDC-P                         | 20.5% (57/278)           | Multivariate                       | GS, ALP, Hg, PSA                                                                             | 50.38 ± 1.18 mo vs. 36.43 ± 2.10 mo, HR = 1.945, 95% CI: 1.111–3.407, p=0.020               |
| Abascal-Junquera J.M. [18]       | 2021 | 118                    | Bx            | IDC-P                         | 31.4% (37/118)           | Univariate                         | –                                                                                            | 38 mo (CI 95% 19.9–48.06) vs. 57.9 mo (CI 95% 56.4–59.5), p=0.001                           |
| Porter L.H. [16]                 | 2018 | 38                     | Bx, RP, TURP  | IDC-P                         | 63% (24/38)              | Multivariate                       | Age                                                                                          | 3.2 years vs 1.8 years, HR: 0.75, p=0.47                                                    |
| Zhao T. [37]                     | 2017 | 131                    | Bx            | IDC-P                         | 47.3% (62/131)           | Multivariate                       | CFS, GS, therapeutic scheme, ECOG score, ALP, LDH                                            | HR: 1.91, 95% CI 1.11-3.29, p=0.020                                                         |
| Zhao J. [38]                     | 2019 | 644                    | Bx            | IDC-P                         | 28.0% (180/644)          | Multivariate                       | GS, ECOG score, ALP, LDH, Hg, IDC-P pattern, IDC-P based risk group                          | HR: 1.80, 95% CI 1.14–2.82, p=0.011                                                         |
| Zhao J. [38]                     | 2019 | 644                    | Bx            | >10% IDC-P (tumour content)   | 12.6% (81/644)           | Multivariate                       | GS, ECOG score, ALP, LDH, Hg, IDC-P pattern, IDC-P based risk group                          | HR: 2.31, 95% CI: 1.38–3.87, p=0.002                                                        |
| Zhao J. [39]                     | 2018 | 314 (training cohort)  | Bx            | IDC-P                         | 27.1% (85/314)           | Multivariate                       | Age, GS, ECOG score, PSA, Hg, ALP                                                            | HR: 1.61, 95% CI: 1.09–2.40, p=0.017                                                        |
| Kato M. [40]                     | 2016 | 150                    | Bx            | IDC-P                         | 67% (100/150)            | Multivariate                       | PSA, cT stage, GS, visceral metastasis, Gleason pattern 5, performance status, pain, Hg, ALP | HR: 2.66, 95% CI: 1.47–4.79, p=0.0012                                                       |
| <i>Disease-specific survival</i> |      |                        |               |                               |                          |                                    |                                                                                              |                                                                                             |
| Elfandy H. [54]                  | 2019 | 818 (HPFD/PHS cohorts) | RP            | IDC-P/CC vs. NC4              | 27% (218/818)            | N/A                                | –                                                                                            | IDC-P/CC: 19.7% (43/218) lethal cases, non-CC Gleason 4 pattern: 7.7% (46/600) lethal cases |
| Elfandy H. [54]                  | 2019 | 818 (HPFD/PHS cohorts) | RP            | IDC-P/CC vs. NC4              | 27% (218/818)            | Multivariate                       | GS                                                                                           | HR: 1.62; 95% CI: 1.05-2.49                                                                 |
| Elfandy H. [54]                  | 2019 | 818 (HPFD/PHS cohorts) | RP            | IDC-P/CC vs. NC4              | 27% (218/818)            | Multivariate                       | GS, age, BMI                                                                                 | HR: 1.67; 95% CI: 1.08-2.59                                                                 |

|                    |      |                                                       |    |                  |                      |              |                                                                                                        |                                                                                            |
|--------------------|------|-------------------------------------------------------|----|------------------|----------------------|--------------|--------------------------------------------------------------------------------------------------------|--------------------------------------------------------------------------------------------|
| Elfandy H. [54]    | 2019 | 818 (HPFD/PHS cohorts)                                | RP | IDC-P/CC vs. NC4 | 27% (218/818)        | Multivariate | GS, age, BMI, cTNM                                                                                     | HR: 1.45; 95% CI: 0.92-2.27                                                                |
| Kato M. [42]       | 2018 | 204                                                   | Bx | IDC-P            | 36% (74/204)         | Univariate   | –                                                                                                      | 5-year: 23.9% vs. 3.2%<br>10-year: 33.7% vs. 9.0%<br>15-year: 52.7% vs. 23.7%,<br>p<0.0001 |
| Kato M. [42]       | 2018 | 204                                                   | Bx | IDC-P            | 36% (74/204)         | Univariate   | –                                                                                                      | HR: 2.624, 95% CI: 1.117-6.164, p=0.0268                                                   |
| Saeter T. [43]     | 2017 | 283                                                   | Bx | IDC-P            | 35% (98/283)         | Multivariate | PSA, clinical T stage, curative treatment                                                              | HR: 2.6, 95% CI: 1.5–4.3, p=0.001                                                          |
| Saeter T. [43]     | 2017 | 283                                                   | Bx | IDC-P            | 35% (98/283)         | Multivariate | PSA, clinical T stage, curative treatment, and GG                                                      | HR: 1.7, 95% CI: 0.9–2.9, p=0.07                                                           |
| Dinerman B.F. [25] | 2017 | 159,777 (SEER)                                        | RP | IDC-P            | 0.002% (242/159,777) | Multivariate | Pathologic T stage, GS, LN status                                                                      | HR:3.0, 95% CI:1.5-5.7, p<0.01                                                             |
| Kimura K. [31]     | 2014 | 206                                                   | RP | IDC-P            | 50.5% (104/206)      | Multivariate | Age, clinical T stage, PSA, Bx GS, neoadjuvant and/or adjuvant hormone therapy                         | HR: 4.48, 95% CI:1.22-16.41, p=0.0238                                                      |
| Tom M.C. [27]      | 2019 | 237                                                   | Bx | IDC-P            | 13% (30/237)         | Multivariate | GG 3, high risk group, ≥50% positive Bx cores, NCCN risk group, race, PSA, ADT                         | HR: 14.26, 95% CI 2.75–74.04, p=0.0016                                                     |
| Kweldam C.F. [29]  | 2015 | 161 GS7                                               | RP | IDC-P            | 41% (66/161)         | Univariate   | –                                                                                                      | HR:2.3, 95% CI: 1.1–4.7, p=0.028                                                           |
| Kweldam C.F. [29]  | 2015 | 161 GS7                                               | RP | IDC-P            | 41% (66/161)         | Multivariate | Age, PSA, GS, pathologic T stage, surgical margin, positive LN, Gleason 4 patterns, tertiary Gleason 5 | HR: 1.0, 95% CI: 0.40–2.7, p=0.93                                                          |
| Kato M. [40]       | 2016 | 150                                                   | Bx | IDC-P            | 67% (100/150)        | Univariate   | –                                                                                                      | HR: 2.13, 95% CI: 1.14–3.99, p=0.0181                                                      |
| Alberts A.R.[55]   |      | 24 cGS ≤6 men reclassified to the ISUP 2014 mGS 3+4=7 | Bx | IDC-P/CC         | 29.2% (7/24)         | NA           | –                                                                                                      | IDC-P/CC: 63% (5/8) of GG 2 fatal PCas had IDC-P/CC vs. 13% (2/16) of non-fatal GG 2 PCas  |

Abbreviations: ADT: androgen deprivation therapy; ALP: alkaline phosphatase; BMI: body mass index; Bx: biopsy; CFS: castrate-resistant prostate cancer-free survival; cGS: classical Gleason Score; CI: confidence interval; CRPC: castrate-resistant prostate cancer; ECOG: Eastern Cooperative Oncology Group; GG: grade group; GS: Gleason score; Hg: Hemoglobin; HPFS: Health Professionals Follow-up Study; HR: hazard ratio; IDC-P: intraductal carcinoma of the prostate; LDH: lactate dehydrogenase; NCCN: National Comprehensive Cancer Network®; mGS: modified Gleason Score; NC4: non-cribriform Gleason 4; mo: months; PHS: Physicians' Health Study; PSA: prostate specific antigen; RP: radical prostatectomy; SEER: Surveillance, Epidemiology and End Results Program, TURP: transurethral resection of the prostate.

**Table S2.** Treatment response in men with IDC-P alone or in combination with CC.

| First author                                                                                                         | Year | # of patients | Treatment group                                             | IDC-P alone or in combination                    | % of positivity | Endpoint                     | Univariate or multivariate | Other factors                                                                | Risk measure                                                                       |
|----------------------------------------------------------------------------------------------------------------------|------|---------------|-------------------------------------------------------------|--------------------------------------------------|-----------------|------------------------------|----------------------------|------------------------------------------------------------------------------|------------------------------------------------------------------------------------|
| <i>Response to neoadjuvant chemotherapy, androgen-deprivation therapy or androgen receptor axis-targeted therapy</i> |      |               |                                                             |                                                  |                 |                              |                            |                                                                              |                                                                                    |
| Efstathiou E. [50]                                                                                                   | 2010 | 115           | Neoadj ADT±CHT                                              | IDC-P/CC at RP                                   | 72% (83/115)    | BCR                          | Multivariate               | Margin status, treatment group                                               | If IDC-P+, RR: 2.98, standard error: 0.46, p=0.02                                  |
| O'Brien C [19]                                                                                                       | 2010 | 50            | Neoadj CHT                                                  | IDC-P at RP                                      | 20% (10/50)     | BCR                          | Multivariate               | Bx GS, cT stage; PSA                                                         | HR: 2.6, 95%CI 1.5-4.3, p<0.001                                                    |
| Kato M [51]                                                                                                          | 2020 | 145           | Neoadj ADT                                                  | IDC-P at Bx and RP (+/+) vs (Bx-/RP± or Bx+/RP-) | 26.2% (38/145)  | Overall survival             | Multivariate               | GS, Gleason pattern 5, n of + core at Bx, tumour volume at Bx, cT stage, PSA | HR: 3.2, 95%CI: 1.47-6.95, p=0.0034)                                               |
| McKay R [56]                                                                                                         | 2021 | 117           | Neoadj abiraterone and/or enzalutamide                      | IDC-P at RP                                      | 46.7% (21/45)   | Complete pathologic response | Univariate                 | –                                                                            | 0% vs. 41.7%, p=0.001                                                              |
| McKay R [56]                                                                                                         | 2021 | 117           | Neoadj abiraterone and/or enzalutamide                      | IDC-P at RP                                      | 46.7% (21/45)   | 3-years BCR-free rare        | Univariate                 | –                                                                            | IDC-P+ 27.6%, 95%CI: 8.9-50.3 vs. IDC-P- 70.4%, 95% CI 47.7-84.7, p=0.004          |
| Wilkinson S [57]                                                                                                     | 2021 | 37            | Neoadj ADT+enzalutamide                                     | IDC-P                                            | 29.7% (11/37)   | Pathologic response          | Univariate                 | –                                                                            | 9.1% vs 53.8%, p=0.013                                                             |
| McKay R [52]                                                                                                         | 2021 | 100           | Neoadj abiraterone, leuprolide and prednisone ± apalutamide | IDC-P                                            | 34% (34/100)    | Pathologic response          | Univariate                 | –                                                                            | Larger tumor, more LN metastasis regardless of treatment arm                       |
| <i>Response to chemotherapy or androgen receptor axis-targeted therapy</i>                                           |      |               |                                                             |                                                  |                 |                              |                            |                                                                              |                                                                                    |
| Chen Z [17]                                                                                                          | 2015 | 24            | CHT for CRPC                                                | IDC-P                                            | 62.5% (15/24)   | PSA response                 | Univariate                 | –                                                                            | 20% vs 67%, p=0.022                                                                |
| Zhao J [37]                                                                                                          | 2017 | 96            | CHT or abiraterone for CRPC                                 | IDC-P                                            | 47.3% (62/131)  | PSA response                 | Univariate                 | –                                                                            | In IDC-P+: abiraterone: 52.4% vs. docetaxel: 21.7%, p=0.035                        |
| Yamamoto A [58]                                                                                                      | 2018 | 79            | ADT ± docetaxel for CRPC                                    | IDC-P                                            | 78.5% (62/79)   | Cancer-specific survival     | Univariate                 | –                                                                            | IDC-P+, with CHT: 20.5 mo vs. IDC-P - 53.2 mo, HR: 2.98, 95%CI: 1.02-8.64, p=0.044 |
| Yamamoto A [58]                                                                                                      | 2018 | 79            | ADT ± docetaxel for CRPC                                    | IDC-P                                            | 78.5% (62/79)   | Cancer-specific survival     | Univariate                 | –                                                                            | IDC-P+, with CHT: 20.5 mo vs no CHT: 14.7 mo, HR: 0.44, 95%CI: 0.22-0.91, p=0.026  |

| First author                                  | Year | # of patients | Treatment group                     | IDC-P alone or in combination | % of positivity | Endpoint         | Univariate or multivariate | Other factors                      | Risk measure                                                                 |
|-----------------------------------------------|------|---------------|-------------------------------------|-------------------------------|-----------------|------------------|----------------------------|------------------------------------|------------------------------------------------------------------------------|
| Yamamoto A [59]                               | 2020 | 170           | CHT vs. abiraterone or enzalutamide | IDC-P                         | 60.6% (103/170) | Overall survival | Univariate                 | --                                 | abiraterone/enzalutamide vs CHT in IDC-P+: HR 0.48, 95% CI 0.26–0.86; p=0.01 |
| <i>Response to adjuvant radiation therapy</i> |      |               |                                     |                               |                 |                  |                            |                                    |                                                                              |
| Trinh VQ [15]                                 | 2019 | 293           | RP ± adjuvant radiation therapy     | IDC-P                         | 24.9% (73/293)  | Time to BCR      | Multivariate               | Grade, stage, margin status, IDC-P | Adjuvant radiation therapy, HR: 0.38, 95%CI 0.17-0.85, p=0.018               |

Abbreviations: ADT: androgen-deprivation therapy; BCR: biochemical recurrence; Bx: biopsy; CC: cribriform carcinoma; CHT: chemotherapy; CI: confidence interval; CRPC: castrate-resistant prostate cancer; GS: Gleason score; IDC-P: intraductal carcinoma of the prostate; HR: hazard ratio; LN: lymph node; mo: months; Neoadj: neoadjuvant; PSA: prostate specific antigen; RP: radical prostatectomy; RR: relative risk.
